# Supplementary material
Source: publisher figshare collection journal article supplement (https://acs.figshare.com/ndownloader/files/18053729)
Supplement: Supplementary file 1 [file 18053729]

## ***Supporting Information***

# Visible light-controlled reaction-separation for asymmetric sulfoxidation in water with photo-responsive metallomicelles

Zhiyang Tang, Weiying Wang, Yibing Pi, Jiajun Wang, Chaoping Li, Rong Tan,\* and Donghong

Yin

National & Local Joint Engineering Laboratory for New Petro-chemical Materials and Fine Utilization of Resources; Key Laboratory of Chemical Biology and Traditional Chinese Medicine Research (Ministry of Education); Key Laboratory of the Assembly and Application of Organic Functional Molecules of Hunan Province, Hunan Normal University, No.36, South Lushan Road, Changsha, Hunan 410081 (P. R. China)

\*Corresponding author. Email: yiyangtanrong@126.com.

Number of pages: 24 (from S1 to S24)

Number of figures: 36

## CONTENT:

1. Identification of catalysts ( $\text{PS}_{29}(\text{IC})_2$ ,  $\text{PS}_{10}(\text{IC})_2$ ,  $\text{PS}_6(\text{IC})_2$ , and  $\text{PS}_{10}\text{C}_2$ ) and the intermediates
2. Identification of the obtained chiral sulfoxides (methyl phenyl sulfoxide, *p*-methoxyphenyl methyl sulfoxide, *o*-methoxyphenyl methyl sulfoxide, phenyl ethyl sulfoxide, phenyl *n*-butyl sulfoxide, phenyl *n*-hexyl sulfoxide, and *p*-bromophenyl methyl sulfoxide).

**1. Identification of the catalysts (PS<sub>29</sub>(IC)<sub>2</sub>, PS<sub>10</sub>(IC)<sub>2</sub>, PS<sub>6</sub>(IC)<sub>2</sub>, and PS<sub>10</sub>C<sub>2</sub>) and the intermediates.**

*9,9,9a-Trimethyl-2,3,9,9a-tetrahydrooxazolo[3,2-a]indole (denoted as 1).*

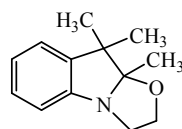

**Compound 1**

The structure of **compound 1** was identified by <sup>1</sup>H NMR spectrum (see Figure S1). <sup>1</sup>H NMR (500 MHz, CDCl<sub>3</sub>): δ (ppm): 7.18-6.79 (*m*, 4 H, ArH), 3.89-3.86 (*m*, 2 H, N-CH<sub>2</sub>-CH<sub>2</sub>-O), 3.74-3.54 (*m*, 2 H, N-CH<sub>2</sub>-CH<sub>2</sub>-O), 1.47 (s, 3 H, N=C-CH<sub>3</sub>), 1.41-1.22 (*m*, 6 H, -C(CH<sub>3</sub>)<sub>2</sub>). FT-IR (KBr): γ<sub>max</sub>/cm<sup>-1</sup> 3045, 3023, 2881, 1725, 1607, 1595, 1479, 1455, 1384, 1375, 1361, 1336, 1294, 1217, 1178, 1155, 1146, 1115, 1078, 1022, 935, 884, 846, 802, 770, 747, 684, 650, 596, 571, 550, 541, 511, 462.

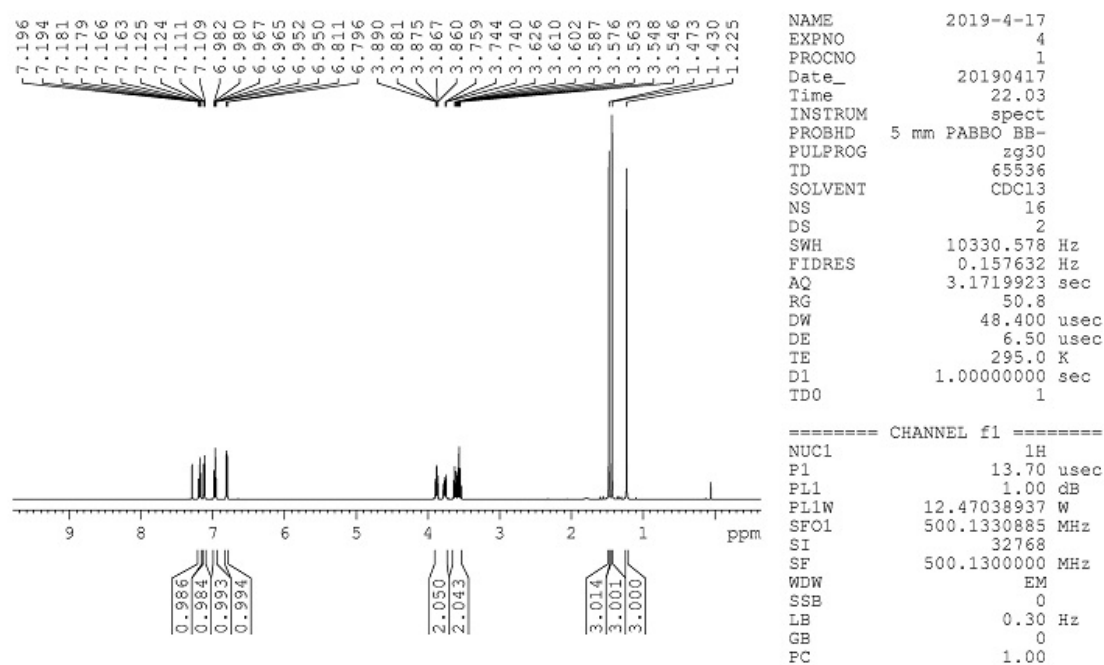

**Figure S1. <sup>1</sup>H NMR of compound 1.**

*2-(3,3'-dimethyl-6-nitro-3'H-spiro[chromene-2,2'-indol]-1'-yl)-ethanol (denoted as 2).*

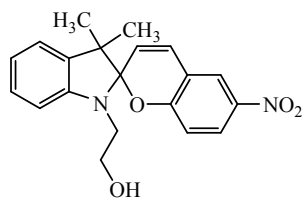

**Compound 2**

The structure of **compound 2** was identified by  $^1\text{H}$  NMR spectrum (see Figure S2).  $^1\text{H}$  NMR (500 MHz,  $\text{CDCl}_3$ ):  $\delta$  (ppm): 8.06-7.20 (m, 3 H, ArH in benzopyran), 7.14-7.12 (m, 1 H, -CH=CH-Ph), 6.95-6.77 (m, 4 H, ArH in indoline), 6.70-6.68 (m, 1 H, -CH=CH-Ph), 5.92-5.90 (m, 1 H, -CH=CH-Ph), 3.77 (s, 1 H,  $-\text{C}_2\text{H}_4\text{OH}$ ), 3.76-3.34 (m, 4 H,  $-\text{C}_2\text{H}_4\text{OH}$ ), 1.31-1.22 (m, 6 H,  $-\text{C}(\text{CH}_3)_2$ ). FT-IR (KBr):  $\gamma_{\text{max}}/\text{cm}^{-1}$  3335, 3062, 2962, 2867, 1650, 1609, 1577, 1509, 1480, 1458, 1380, 1362, 1335, 1273, 1219, 1156, 1123, 1089, 1051, 1023, 952, 917, 836, 808, 787, 748, 719, 687, 553, 498, 476, 451.

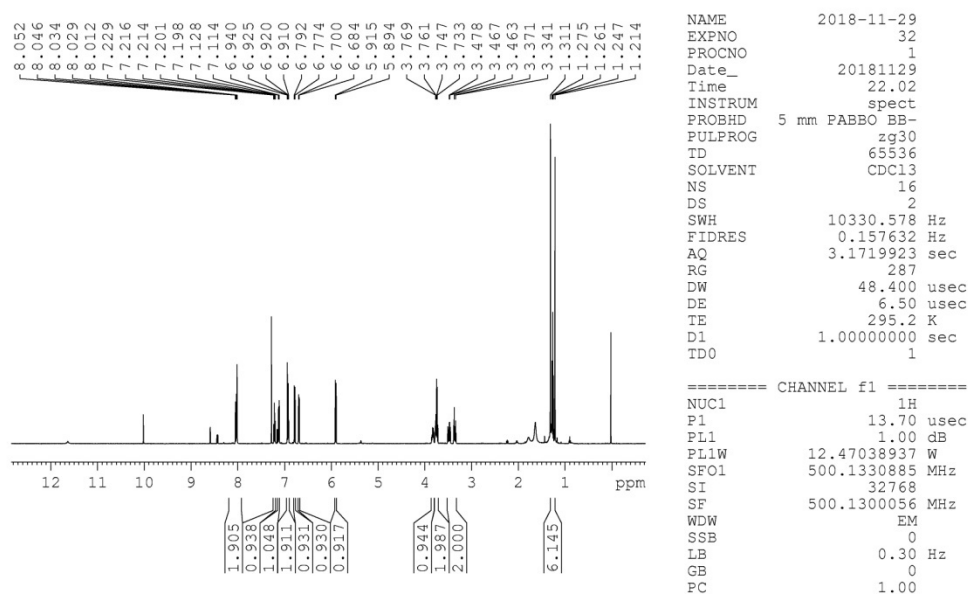

**Figure S2.**  $^1\text{H}$  NMR of compound 2.

*1'-(2-methacryloxyethyl)-3',3'-dimethyl-6-nitro-spiro(2H-1-benzopyran-2,2'-indoline)* (denoted as **SPA**)

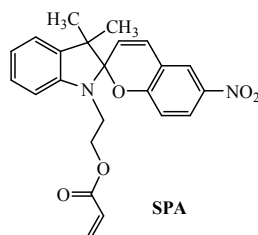

The structure of **SPA** was identified by  $^1\text{H}$  NMR (see Figure S3) and  $^{13}\text{C}$  NMR spectra (see Figure S4).  $^1\text{H}$  NMR (500 MHz,  $\text{DMSO}-d_6$ ):  $\delta$  (ppm): 8.49-8.07 (m, 3 H, ArH in benzopyran), 8.00-7.49 (m, 4 H, ArH in indoline), 7.32-7.10 (m, 1 H,  $-\text{CH}=\text{CH}-\text{Ph}$ ), 7.02-6.79 (m, 1 H,  $-\text{CH}=\text{CH}-\text{Ph}$ ), 6.77-6.53 (m, 1 H,  $\text{CH}_2=\text{CH}-\text{C}=\text{O}$ ), 5.70-5.48 (m, 2 H,  $\text{CH}_2=\text{CH}-\text{C}=\text{O}$ ), 4.93-4.76 (m, 2 H,  $\text{N}-\text{CH}_2-\text{CH}_2-\text{O}-\text{C}=\text{O}$ ), 4.00-3.91 (m, 2 H,  $\text{N}-\text{CH}_2-\text{CH}_2-\text{O}-\text{C}=\text{O}$ ), 1.82 (s, 6 H,  $-\text{C}(\text{CH}_3)_2$ ).

$^{13}\text{C}$  NMR (500 MHz,  $\text{DMSO}-d_6$ ):  $\delta$  (ppm): 183.63 (s), 144.15 (s), 141.35 (s), 140.09 (s), 129.97 (s), 129.49 (s), 129.42 (s), 126.91 (s), 123.44 (s), 121.82 (s), 118.06 (s), 116.37 (s), 115.71 (s), 106.84 (s), 58.87 (s), 52.80 (s), 52.71 (s), 50.30 (s), 39.90 (s), 39.97 (s), 39.92 (s), 31.26 (s), 26.62 (s). FT-IR (KBr):  $\gamma_{\text{max}}/\text{cm}^{-1}$  3364, 3226, 2975, 2937, 2738, 2676, 2601, 2528, 2491, 1726, 1609, 1586, 1540, 1515, 1474, 1434, 1397, 1383, 1366, 1339, 1320, 1294, 1263, 1169, 1131, 1078, 1036, 981, 967, 955, 860, 839, 805, 763, 751, 703, 668, 653, 571, 455.

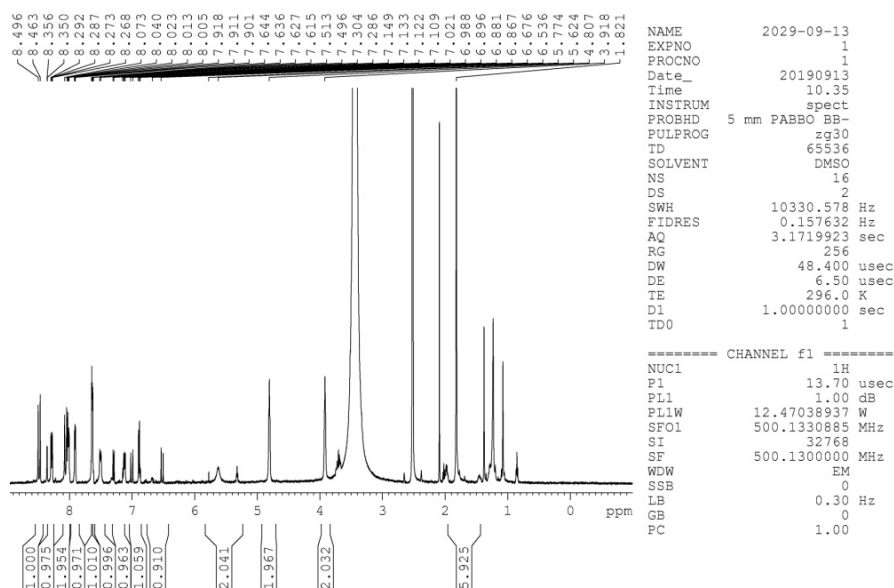

**Figure S3.**  $^1\text{H}$  NMR of SPA.

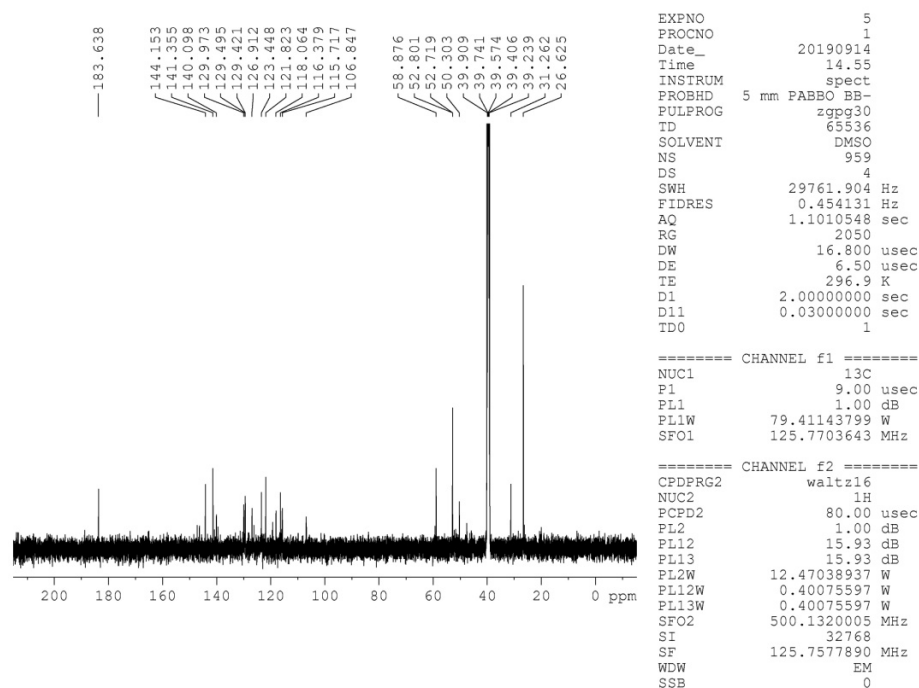

**Figure S4.**  $^{13}\text{C}$  NMR of SPA.

## PS<sub>29</sub>(IC)<sub>2</sub>

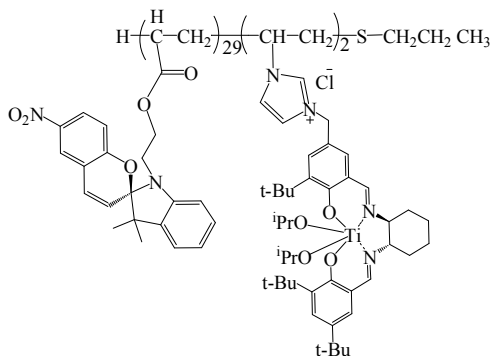

The structure and chemical composition of **PS<sub>29</sub>(IC)<sub>2</sub>** were identified by  $^1\text{H}$  NMR spectrum (see Figure S5).  $^1\text{H}$  NMR (500 MHz,  $\text{CDCl}_3$ ):  $\delta$  (ppm): 8.28 (m, 29 H, ArH in SPA), 7.98 (m, 29 H, ArH in SPA), 7.59-7.58 (m, 58 H, ArH in SPA), 7.45-7.48 (m, 29 H, ArH in SPA), 7.37 (m, 8 H, ArH in Ti(salen)), 7.33 (m, 29 H, ArH in SPA), 7.04-7.13 (m, 29 H, ArH in SPA), 6.86-6.90 (m, 29 H,  $-\text{CH}=\text{CH}-\text{Ph}$  in SPA), 6.01 (m, 2 H, N- $\text{CH}-\text{CH}_2-$  of N-vinyl in IL), 5.81-5.91 (m, 29 H,  $-\text{CH}=\text{CH}-\text{Ph}$  in SPA), 4.29-3.81 (m, 58 H, N- $\text{CH}_2-\text{CH}_2-\text{O}$  in SPA), 3.58-3.53 (m, 58 H,

N-CH<sub>2</sub>-CH<sub>2</sub>-O in SPA), 3.25-3.22 (m, 8 H, -CH-CH<sub>2</sub>- of N-vinyl and -N-CH<sub>2</sub>-N- in IL), 3.07 (m, 12 H, -N-CH<sub>2</sub>-CH<sub>2</sub>-N- and -N-CH<sub>2</sub>-Ph in IL/Ti(salen)), 2.95 (m, 2 H, S-CH<sub>2</sub>-CH<sub>2</sub>-CH<sub>3</sub>), 2.93 (m, 2 H, S-CH<sub>2</sub>-CH<sub>2</sub>-CH<sub>3</sub>), 2.78 (m, 4 H, CH<sub>3</sub>-CH-CH<sub>3</sub> of <sup>t</sup>PrO- in Ti(salen)), 1.61-1.58 (m, 58 H, -CH<sub>2</sub>-CH- in SPA), 1.53 (s, 3 H, S-CH<sub>2</sub>-CH<sub>2</sub>-CH<sub>3</sub>), 1.36-1.34 (54 H, -C(CH<sub>3</sub>)<sub>3</sub> in Ti(salen)), 1.31-1.28 (m, 24 H, cyclohexyl-H), 1.27-1.26 (m, 24 H, -CH(CH<sub>3</sub>)<sub>2</sub> in Ti(salen)), 0.86-0.83 (m, 174 H, -C(CH<sub>3</sub>)<sub>2</sub> in SPA). The degrees of polymerization of the individual SPA and IL/Ti(salen) were determined in the <sup>1</sup>H NMR spectrum (see Figure S4) by comparing the signals attributable to individual blocks (SPA at 0.86-0.83 ppm assigned to -C(CH<sub>3</sub>)<sub>2</sub> and IL/Ti(salen) at *ca.* 6.01 ppm assigned to N-CH-CH<sub>2</sub>- of N-vinyl in IL) with that of end methyl group (-SH-CH<sub>2</sub>-CH<sub>2</sub>-CH<sub>3</sub>) (at *ca.* 1.53 ppm). FT-IR (KBr):  $\gamma_{\max}/\text{cm}^{-1}$  3425, 2973, 2965, 2884, 1724, 1607, 1656, 1583, 1537, 1523, 1480, 1461, 1399, 1370, 1340, 1316, 1294, 1269, 1232, 1170, 1130, 1088, 1049, 955, 881, 840, 808, 766, 749, 701, 634, 570, 545, 493, 446, 421. GPC (THF):  $M_n$  = 15412,  $M_w$  = 23426, PDI = 1.52.  $\alpha_{25}^D$  = -23.1 (C = 0.005 g.mL<sup>-1</sup>, CH<sub>2</sub>Cl<sub>2</sub>), titanium content: 0.075 mmol.g<sup>-1</sup>.

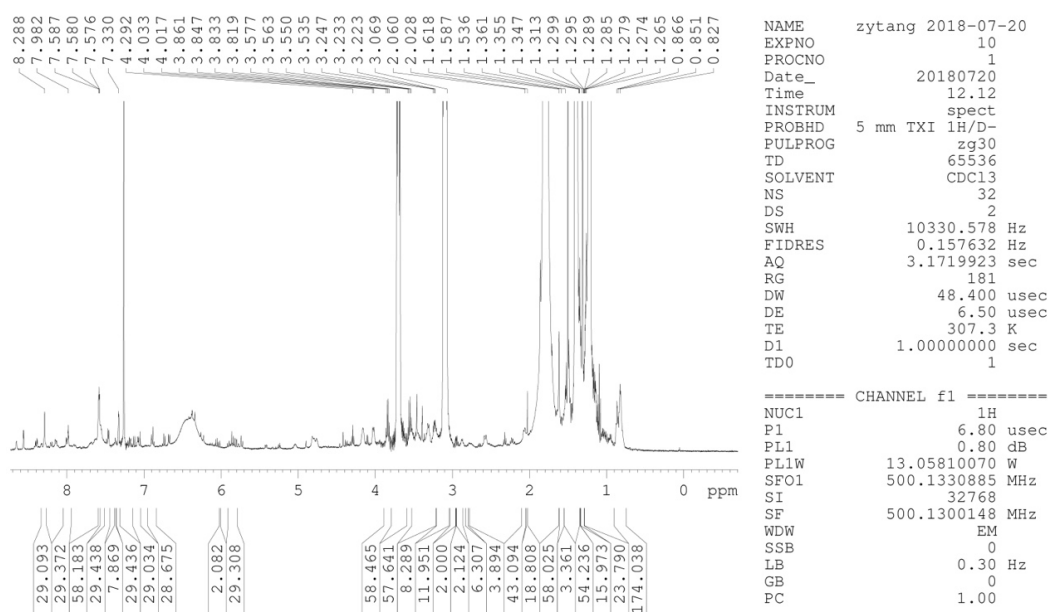

**Figure S5.** <sup>1</sup>H NMR of the PS<sub>29</sub>(IC)<sub>2</sub>.

**PS<sub>10</sub>(IC)<sub>2</sub>**

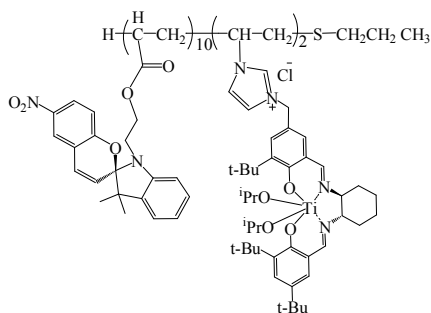

The structure and chemical composition of **PS<sub>10</sub>(IC)<sub>2</sub>** were identified by <sup>1</sup>H NMR spectrum (see Figure S6). <sup>1</sup>H NMR (500 MHz, CDCl<sub>3</sub>): δ (ppm): 8.15-8.13(m, 10 H, ArH in SPA), 8.09-8.06 (m, 10 H, ArH in SPA), 7.89-7.87 (m, 10 H, ArH in SPA), 7.74 (m, 10 H, ArH in SPA), 7.49-7.45 (m, 8 H, ArH in Ti(salen)), 7.07 (m, 10 H, ArH in SPA), 6.90-6.89 (m, 10 H, ArH in SPA), 6.74-6.73 (m, 10 H, ArH in SPA), 6.25-6.21 (m, 10H, -CH=CH-Ph in SPA), 5.89 (m, 2 H, N-CH-CH<sub>2</sub>- of N-vinyl in IL), 5.87-5.80 (m, 10 H, -CH=CH-Ph in SPA), 3.70 (m, 20 H, N-CH<sub>2</sub>-CH<sub>2</sub>-O in SPA), 3.58-3.55 (m, 20 H, N-CH<sub>2</sub>-CH<sub>2</sub>-O in SPA), 3.39 (m, 8 H, -CH-CH<sub>2</sub>- of N-vinyl and -N-CH<sub>2</sub>-N- in IL), 3.08 (m, 12 H, -N-CH<sub>2</sub>-CH<sub>2</sub>-N- and -N-CH<sub>2</sub>-Ph- in IL/Ti(salen)), 2.95 (m, 2 H, S-CH<sub>2</sub>-CH<sub>2</sub>-CH<sub>3</sub>), 2.80-2.78 (m, 4 H, CH<sub>3</sub>-CH-CH<sub>3</sub> of <sup>i</sup>PrO- in Ti(salen)), 2.56 (m, 2 H, S-CH<sub>2</sub>-CH<sub>2</sub>-CH<sub>3</sub>), 1.71 (m, 3 H, S-CH<sub>2</sub>-CH<sub>2</sub>-CH<sub>3</sub>), 1.50-1.48 (m, 20 H, -CH<sub>2</sub>-CH- in SPA), 1.36-1.31 (m, 54 H, -C(CH<sub>3</sub>)<sub>3</sub> in Ti(salen)), 1.26 (m, 16 H, cyclohexyl-H), 1.23 (m, 24 H, -CH(CH<sub>3</sub>)<sub>2</sub> in Ti(salen)), 0.88-0.83 (m, 60 H, -C(CH<sub>3</sub>)<sub>2</sub> in SPA). The degrees of polymerization of the individual SPA and IL/Ti(salen) were determined in the <sup>1</sup>H NMR spectrum (see Figure S5) by comparing the signals attributable to individual blocks (SPA at 0.88-0.83 ppm assigned to -C(CH<sub>3</sub>)<sub>2</sub> and IL/Ti(salen) at ca. 5.89 ppm assigned to N-CH-CH<sub>2</sub>- of N-vinyl in IL) with that of end methyl group (-SH-CH<sub>2</sub>-CH<sub>2</sub>-CH<sub>3</sub>) (at ca. 1.71 ppm). FT-IR (KBr): γ<sub>max</sub>/cm<sup>-1</sup> 3434, 2970, 2958, 2879, 1708, 1598, 1654, 1581, 1531, 1521, 1478, 1460, 1397, 1368, 1328, 1308, 1290, 1270,



1235, 1167, 1127, 1085, 1048, 951, 880, 839, 806, 766, 749, 699, 635, 565, 540, 486, 441, 418.

GPC (THF):  $M_n = 6790$ ,  $M_w = 9590$ , PDI = 1.62.  $\alpha_{25}^D = -17.5$  ( $C = 0.005 \text{ g.mL}^{-1}$ ,  $\text{CH}_2\text{Cl}_2$ ),

Titanium content:  $0.176 \text{ mmol.g}^{-1}$ .

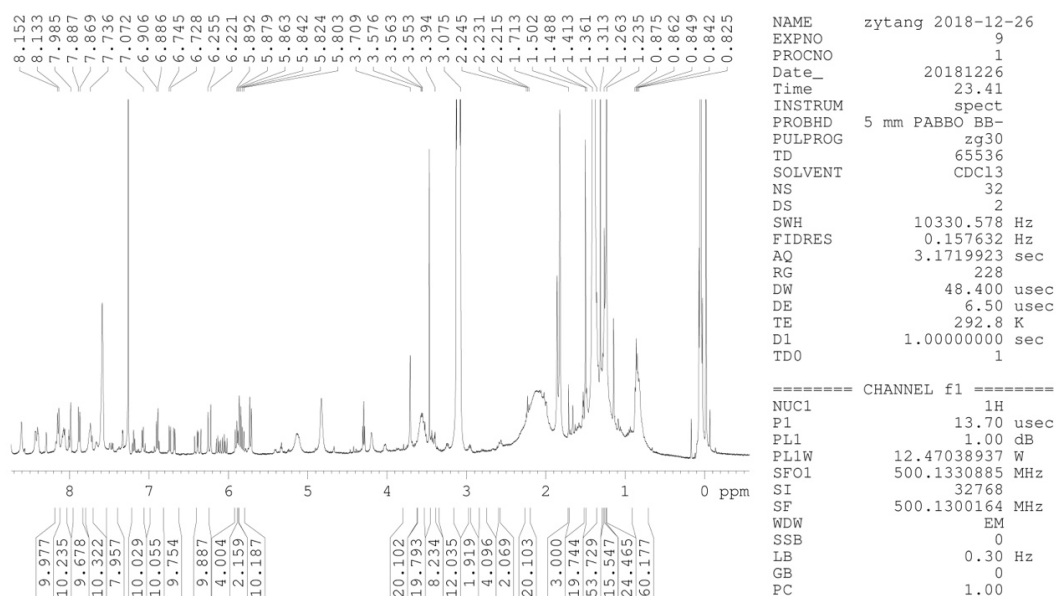

**Figure S6.**  $^1\text{H}$  NMR of the  $\text{PS}_{10}(\text{IC})_2$ .

## $\text{PS}_6(\text{IC})_2$

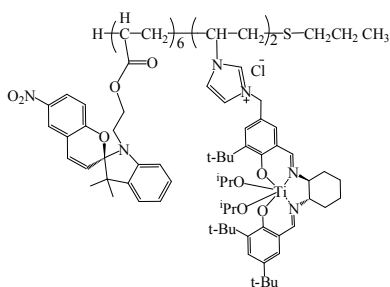

The structure and chemical composition of  $\text{PS}_6(\text{IC})_2$  were identified by  $^1\text{H}$  NMR spectrum (see Figure S7).  $^1\text{H}$  NMR (500 MHz,  $\text{CDCl}_3$ ):  $\delta$  (ppm): 8.50 (m, 6 H, ArH in SPA), 8.34-8.31 (m, 6 H, ArH in SPA), 8.23-8.22 (m, 6 H, ArH in SPA), 8.06 (m, 6 H, ArH in SPA), 8.03-8.00 (m, 6 H, ArH in SPA), 7.99-7.97 (m, 6 H, ArH in SPA), 7.92-7.91 (m, 6 H, ArH in SPA), 7.23-7.20 (m, 8 H, ArH in Ti(salen)), 6.88-6.86 (m, 6 H,  $-\text{CH}=\text{CH}-\text{Ph}$  in SPA), 5.98-5.96 (m, 6 H,  $-\text{CH}=\text{CH}-\text{Ph}$  in SPA), 4.20-4.19 (m, 2 H, N- $\text{CH}-\text{CH}_2$ - of N-vinyl in IL), 3.94-3.92 (m, 12 H, N- $\text{CH}_2-\text{CH}_2-\text{O}$  in

SPA), 3.28-3.23 (m, 12 H, -N-CH<sub>2</sub>-CH<sub>2</sub>-N- and -N-CH<sub>2</sub>-Ph- in IL/Ti(salen)), 3.17 (m, 8 H, -CH-CH<sub>2</sub>- of N-vinyl and -N-CH<sub>2</sub>-N- in IL), 2.77-2.74 (m, 12 H, N-CH<sub>2</sub>-CH<sub>2</sub>-O in SPA), 2.65 (m, 2 H, SH-CH<sub>2</sub>-CH<sub>2</sub>-CH<sub>3</sub>), 2.55 (m, 2 H, SH-CH<sub>2</sub>-CH<sub>2</sub>-CH<sub>3</sub>), 1.55 (m, 3 H, SH-CH<sub>2</sub>-CH<sub>2</sub>-CH<sub>3</sub>), 1.24-1.21 (m, 54 H, -C(CH<sub>3</sub>)<sub>3</sub> in Ti(salen)), 1.20-1.18 (16 H, cyclohexyl-H), 1.17-1.60 (m, 24 H, -CH(CH<sub>3</sub>)<sub>2</sub> in Ti(salen)), 1.01-1.07 (m, 36 H, -C(CH<sub>3</sub>)<sub>2</sub> in SPA). The degrees of polymerization of the individual SPA and IL/Ti(salen) were determined in the <sup>1</sup>H NMR spectrum (see Figure S6) by comparing the signals attributable to individual blocks (SPA at 1.01-1.07 ppm assigned to -C(CH<sub>3</sub>)<sub>2</sub> and IL/Ti(salen) at 4.20-4.19 ppm assigned to N-CH-CH<sub>2</sub>- of N-vinyl in IL) with that of end methyl group (-SH-CH<sub>2</sub>-CH<sub>2</sub>-CH<sub>3</sub>) (at *ca.* 1.55 ppm). FT-IR (KBr):  $\gamma_{\max}/\text{cm}^{-1}$  3431, 3431, 2981, 2978, 2990 1726, 1610, 1661, 1590, 1542, 1525, 1481, 1470, 1343, 1371, 1341, 1319, 1301, 1261, 1225, 1165, 1133, 1088, 1054, 959, 884, 841, 811, 764, 751, 703, 635, 573, 541, 491, 451, 421. GPC (THF):  $M_n$ = 5276,  $M_w$ = 7334, PDI= 1.39.  $\alpha_{25}^D$  = -18.3 (C = 0.005 g.mL<sup>-1</sup>, CH<sub>2</sub>Cl<sub>2</sub>), Titanium content: 0.247 mmol.g<sup>-1</sup>.

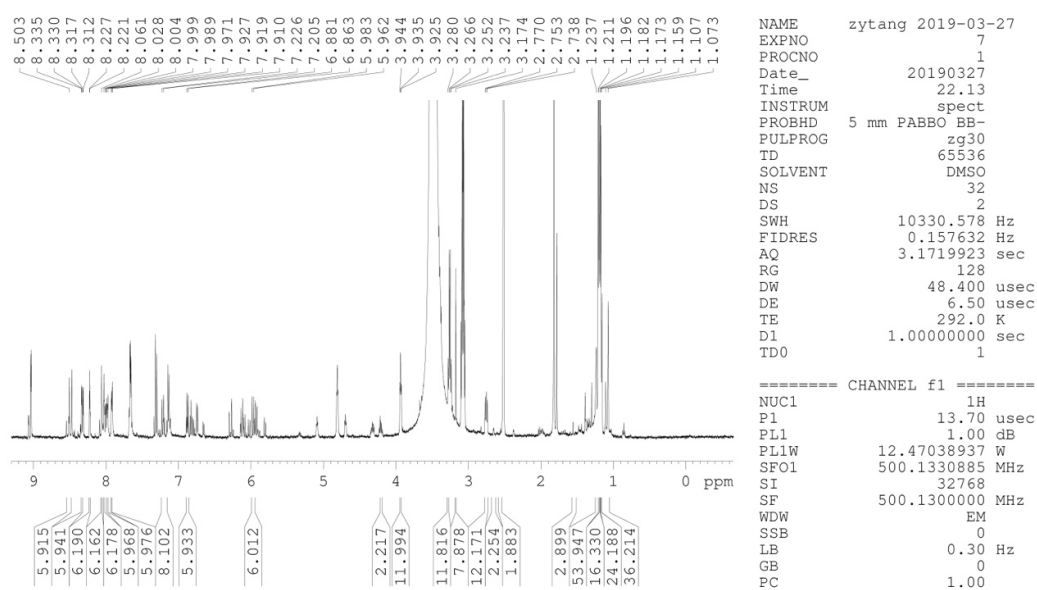

**Figure S7.** <sup>1</sup>H NMR of the PN<sub>6</sub>(IS)<sub>2</sub>

## PS<sub>10</sub>C<sub>2</sub>

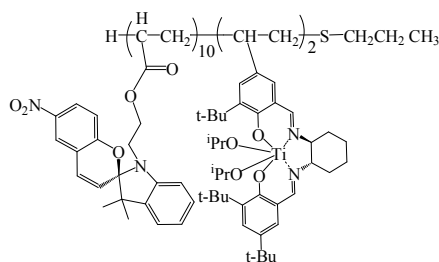

The structure and chemical composition of **PS<sub>10</sub>C<sub>2</sub>** were identified by <sup>1</sup>H NMR spectrum (see Figure S8). <sup>1</sup>H NMR (500 MHz, DMSO-*d*<sub>6</sub>): δ (ppm): 8.35-8.31 (m, 10 H, ArH in SPA), 8.09-8.00 (m, 10 H, ArH in SPA), 7.94-7.92 (m, 10 H, ArH in SPA), 7.67-7.65 (m, 10 H, ArH in SPA), 7.45-7.40 (m, 10 H, ArH in SPA), 5.96 (m, 10 H, -CH=CH-Ph in SPA), 5.11-5.10 (m, 10 H, -CH=CH-Ph in SPA), 3.95-3.93 (m, 20 H, N-CH<sub>2</sub>-CH<sub>2</sub>-O in SPA), 3.30-3.25 (m, 20 H, N-CH<sub>2</sub>-CH<sub>2</sub>-O in SPA), 2.77 (m, 4 H, CH<sub>3</sub>-CH-CH<sub>3</sub> of <sup>i</sup>PrO- in Ti(salen)), 1.48-1.44 (m, 3H, S-CH<sub>2</sub>-CH<sub>2</sub>-CH<sub>3</sub>), 1.24 (m, 16 H, cyclohexyl-H), 1.23-1.21 (m, 24 H, CH<sub>3</sub>-CH-CH<sub>3</sub> of <sup>i</sup>PrO- in Ti(salen)), 1.20 (m, 54 H, -C(CH<sub>3</sub>)<sub>3</sub> in Ti(salen)), 1.18-1.17 (m, 60 H, -C(CH<sub>3</sub>)<sub>2</sub> in SPA). The degree of polymerization of the individual SPA and Ti(salen) were determined using the <sup>1</sup>H NMR spectrum (see Figure S7) by comparing the signals attributable to individual blocks (SPA at 1.16-1.17 ppm assigned to -C(CH<sub>3</sub>)<sub>2</sub>, and Ti(salen) at 2.75-2.78 ppm assigned to CH<sub>3</sub>-CH-CH<sub>3</sub> of <sup>i</sup>PrO- groups) with that of an end methyl group (-SH-CH<sub>2</sub>-CH<sub>2</sub>-CH<sub>3</sub>, at 1.44-1.48 ppm). FT-IR (KBr): γ<sub>max</sub>/cm<sup>-1</sup> 3428, 2973, 2954, 2871, 1701, 1590, 1655, 1581, 1531, 1521, 1478, 1460, 1397, 1368, 1328, 1308, 1290, 1270, 1235, 1167, 1127, 1085, 1048, 951, 880, 839, 801, 766, 749, 697, 565, 540. GPC (THF): *M*<sub>n</sub> = 6982, *M*<sub>w</sub> = 8624, PDI = 1.24. α<sub>25</sub><sup>D</sup> = -20.9 (C = 0.005 g.mL<sup>-1</sup>, CH<sub>2</sub>Cl<sub>2</sub>), Titanium content: 0.175 mmol.g<sup>-1</sup>.

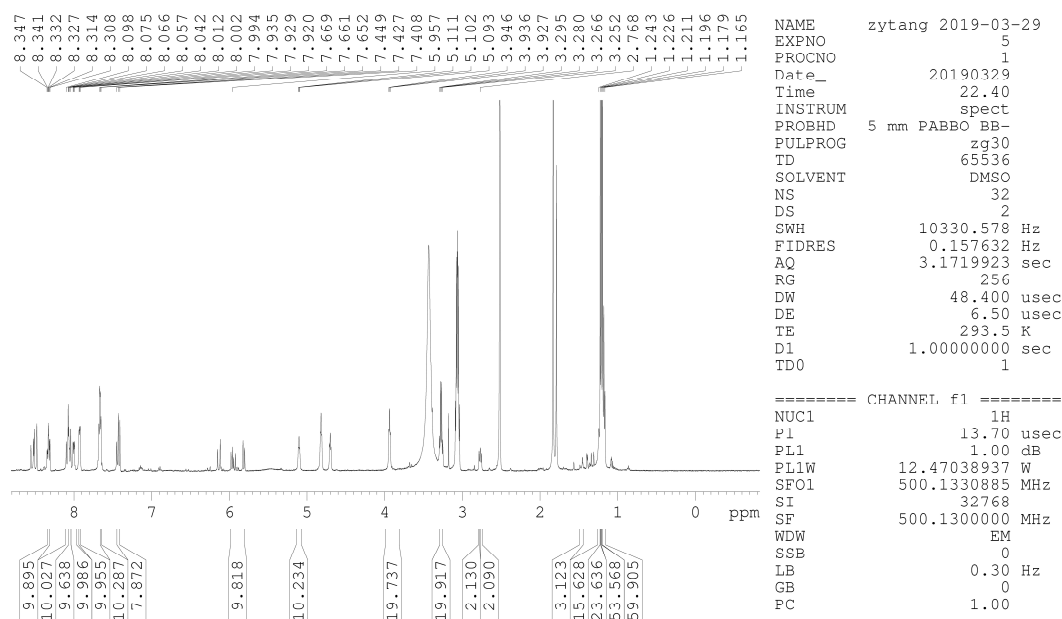

**Figure S8.** <sup>1</sup>H NMR of the PS<sub>10</sub>C<sub>2</sub>.

**2. Identification of the obtained chiral sulfoxides** (methyl phenyl sulfoxide, *p*-methoxyphenyl methyl sulfoxide, *o*-methoxyphenyl methyl sulfoxide, phenyl ethyl sulfoxide, phenyl *n*-butyl sulfoxide, phenyl *n*-hexyl sulfoxide, and *p*-bromophenyl methyl sulfoxide).

**Phenyl methyl sulfoxide:** The product has been identified by <sup>1</sup>H NMR spectrum (see Figure S9).

<sup>1</sup>H NMR (CDCl<sub>3</sub>, 500 MHz): δ (ppm): 7.69-7.53 (m, 5 H, ArH), 2.76 (s, 3 H, -SCH<sub>3</sub>).

Chemoselectivity was determined by GC, nitrogen was used as the carrier gas with a flow of 30 mL.min<sup>-1</sup>, injector temperature and detector temperature were 250 °C, column temperature was programmed from 80 to 180 °C with 6 °C.min<sup>-1</sup>, *t*<sub>methyl phenyl sulfoxide</sub> = 6.9 min; ee value was determined by HPLC (*i*-PrOH/*n*-hexane = 1: 9 (v/v)); flow rate = 1.0 mL.min<sup>-1</sup>; 25 °C; λ = 254 nm; major enantiomer *t*<sub>R</sub> = 6.66 min, minor enantiomer *t*<sub>S</sub> = 8.11 min (see Figure S10-S12).

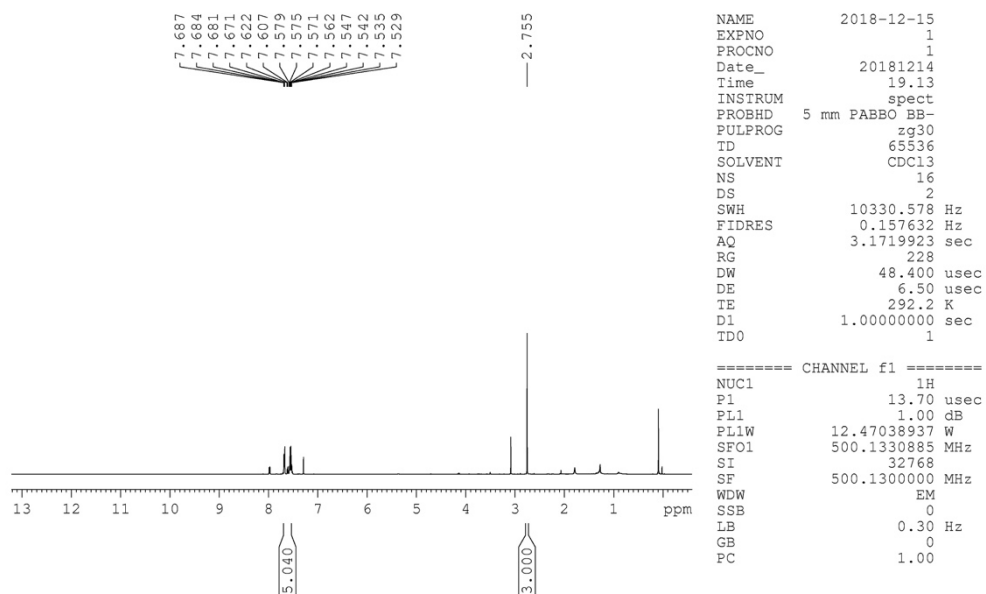

**Figure S9.**  $^1\text{H}$  NMR of phenyl methyl sulfoxide.

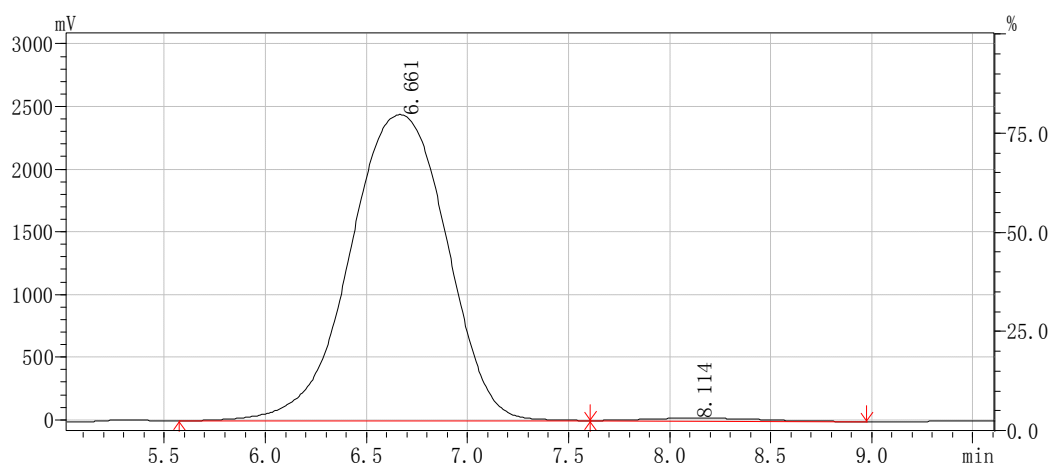

**Figure S10.** HPLC of phenyl methyl sulfoxide obtained over  $\text{PS}_{10}(\text{IS})_2$  (ee value = 99%).

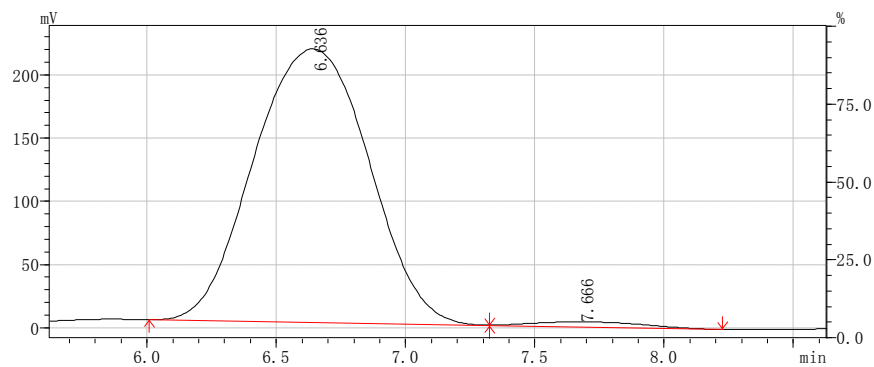

**Figure S11.** HPLC of phenyl methyl sulfoxide obtained over  $\text{PS}_{10}\text{C}_2$  (ee value = 92%).

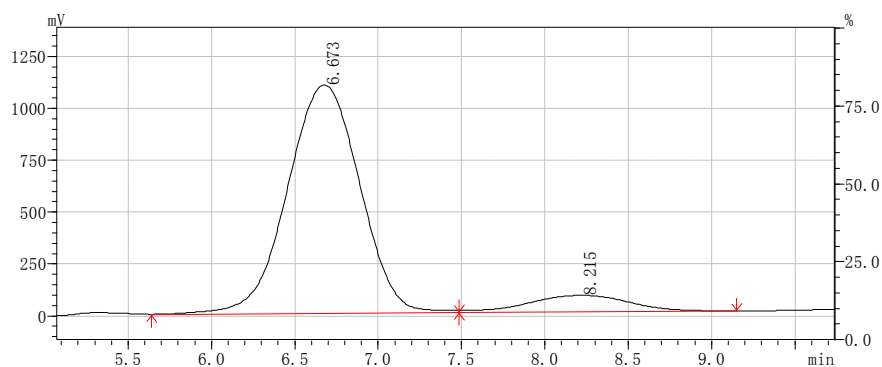

**Figure S12.** HPLC of phenyl methyl sulfoxide obtained over  $IL/\text{Ti}(\text{salen})$  (ee value = 80%).

***p*-Methoxyphenyl methyl sulfoxide:** The product has been identified by  $^1\text{H}$  NMR spectrum (see Figure S13).  $^1\text{H}$  NMR ( $\text{CDCl}_3$ , 500 MHz):  $\delta$  (ppm): 7.64-7.00 (m, 4 H, ArH), 3.89 (s, 3 H,  $-\text{OCH}_3$ ), 2.73 (s, 3 H,  $-\text{SCH}_3$ ). Chemoselectivity was determined by GC, nitrogen was used as the carrier gas with a flow of  $30 \text{ mL}\cdot\text{min}^{-1}$ , injector temperature and detector temperature were  $250^\circ\text{C}$ , column temperature was programmed from  $80$  to  $180^\circ\text{C}$  with  $6^\circ\text{C}\cdot\text{min}^{-1}$ ,  $t_{\text{methyl } p\text{-methoxyphenyl sulfoxide}} = 11.7 \text{ min}$ ; ee value was determined by HPLC ( $i\text{-PrOH}/n\text{-hexane} = 2: 8 \text{ (v/v)}$ ); flow rate =  $1.2 \text{ mL}\cdot\text{min}^{-1}$ ;  $25^\circ\text{C}$ ;  $\lambda = 254 \text{ nm}$ ; major enantiomer  $t_R = 6.65 \text{ min}$  and minor enantiomer  $t_S = 7.79 \text{ min}$  (see Figure S14-S16).

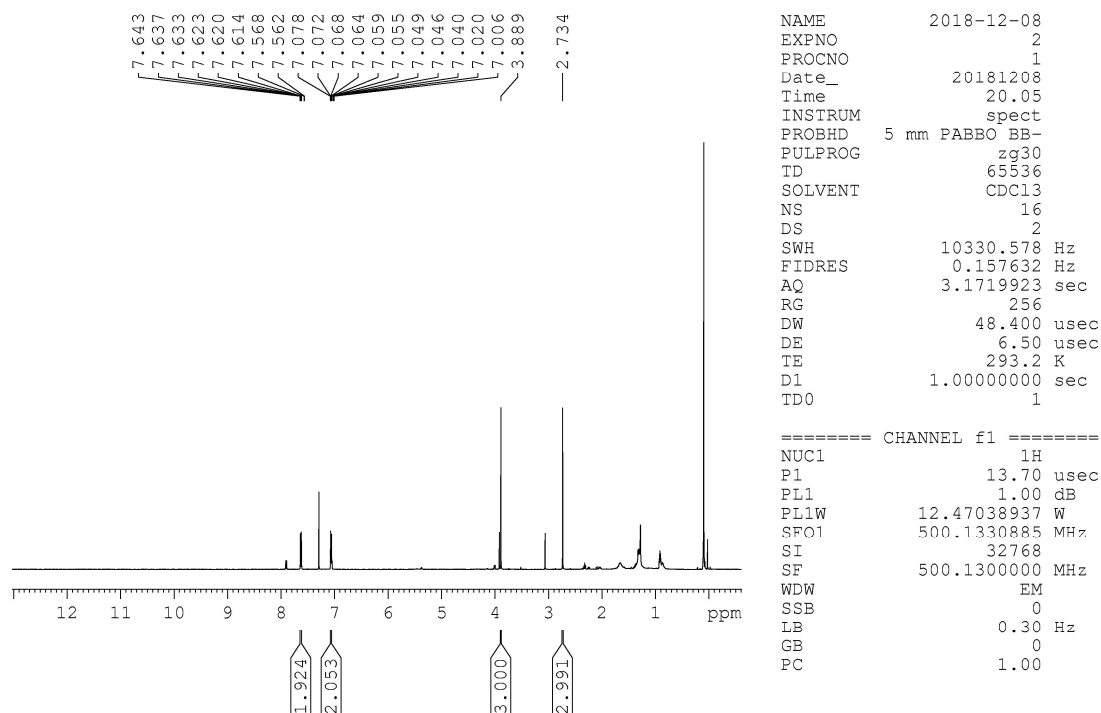

**Figure S13.**  $^1\text{H}$  NMR of *p*-methoxyphenyl methyl sulfoxide.

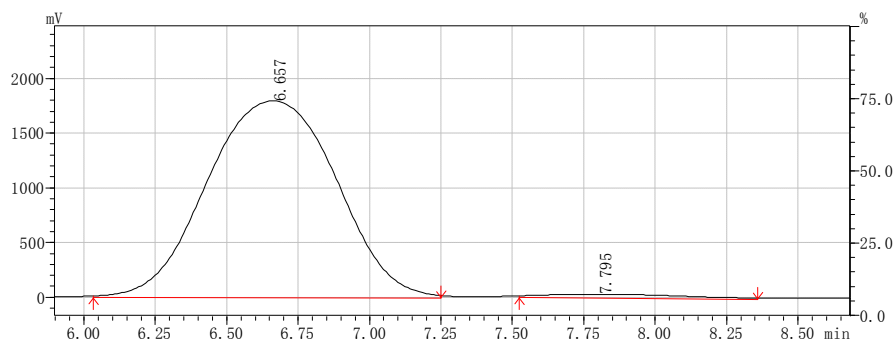

**Figure S14.** HPLC of *p*-methoxyphenyl methyl sulfoxide obtained over  $\text{PS}_{10}(\text{IC})_2$  (ee value = 96%).

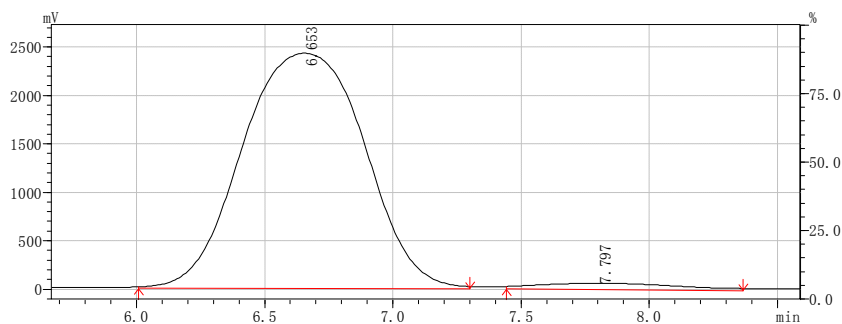

**Figure S15.** HPLC of methyl *p*-methoxyphenyl sulfoxide obtained over  $\text{PS}_{10}\text{C}_2$  (ee value = 94%).

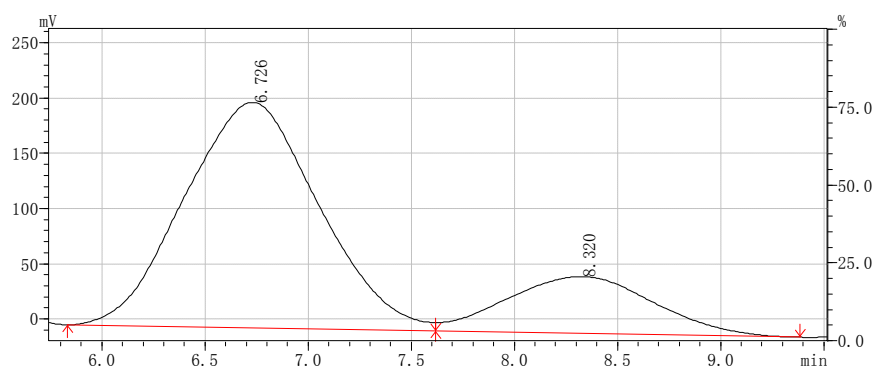

**Figure S16.** HPLC of *p*-methoxyphenyl methyl sulfoxide obtained over *IL*/Ti(salen) (ee value = 58%).

***o*-Methoxyphenyl methyl sulfoxide:** The product has been identified by  $^1\text{H}$  NMR spectrum (see Figure S17).  $^1\text{H}$  NMR ( $\text{CDCl}_3$ , 500 MHz):  $\delta$  (ppm): 7.85-6.94 (m, 4 H, ArH), 3.91 (s, 3 H,  $-\text{OCH}_3$ ), 2.80 (s, 3 H,  $-\text{SCH}_3$ ). Chemoselectivity was determined by GC, nitrogen was used as the carrier gas with a flow of  $30 \text{ mL}\cdot\text{min}^{-1}$ , injector temperature and detector temperature were  $250^\circ\text{C}$ , column temperature was  $180^\circ\text{C}$ ,  $t_{\text{methyl } o\text{-methoxyphenyl sulfoxide}} = 9.8 \text{ min}$ ; ee value was determined by HPLC (*i*-PrOH/*n*-hexane = 2: 8 (v/v)); flow rate =  $1.2 \text{ mL}\cdot\text{min}^{-1}$ ;  $25^\circ\text{C}$ ;  $\lambda = 254 \text{ nm}$ ; major enantiomer  $t_R = 6.66 \text{ min}$  and minor enantiomer  $t_S = 7.79 \text{ min}$  (see Figure S18- S20).

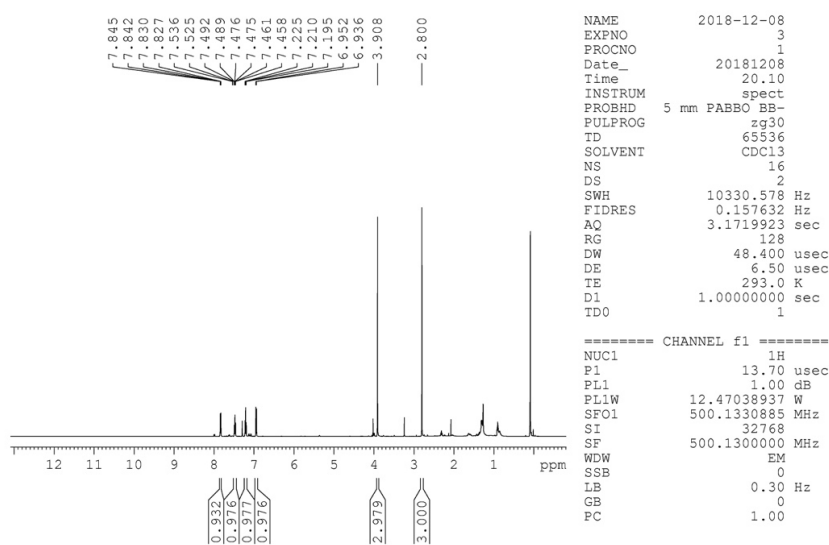

**Figure S17.**  $^1\text{H}$  NMR of *o*-methoxyphenyl methyl sulfoxide.



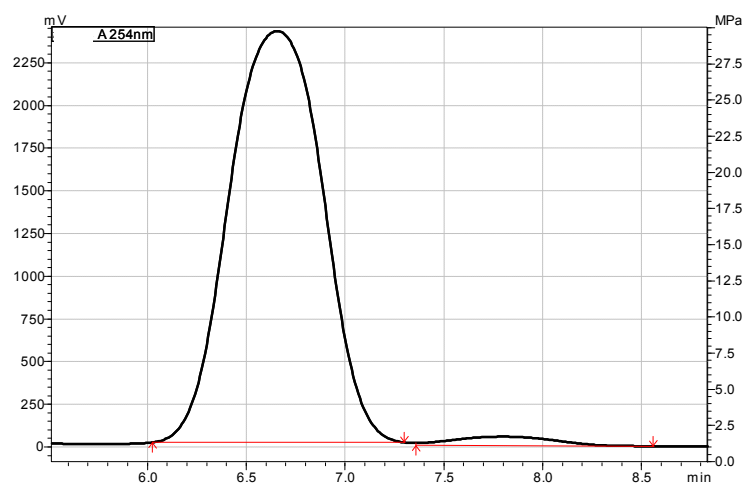

**Figure S18.** HPLC of *o*-methoxyphenyl methyl sulfoxide obtained over  $\text{PS}_{10}(\text{IC})_2$  (ee value = 96%).

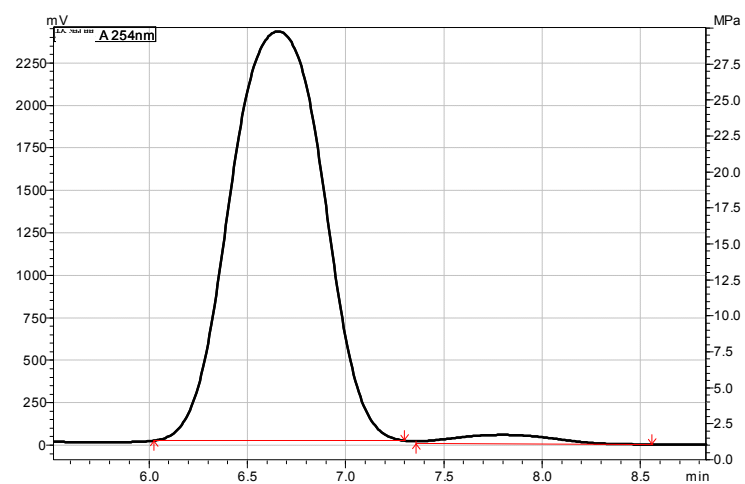

**Figure19.** HPLC of *o*-methoxyphenyl methyl sulfoxide obtained over  $\text{PS}_{10}\text{C}_2$  (ee value = 95%).

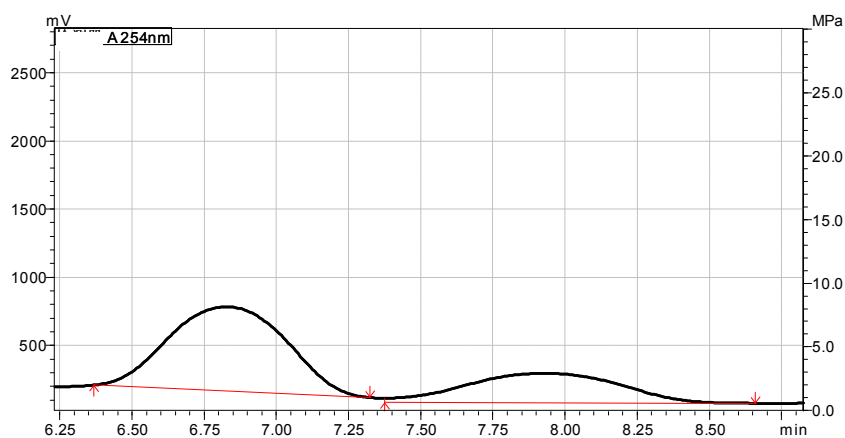

**Figure S20.** HPLC of *o*-methoxyphenyl methyl sulfoxide obtained over  $\text{IL}/\text{Ti}(\text{salen})$  (ee value = 37%).

**Phenyl ethyl sulfoxide:** The product has been identified by  $^1\text{H}$  NMR spectrum (see Figure S21).

$^1\text{H}$  NMR ( $\text{CDCl}_3$ , 500 MHz):  $\delta$  (ppm): 7.69-7.61 (m, 5 H, ArH), 2.97-2.77 (m, 2 H,  $-\text{CH}_2-\text{CH}_3$ ), 1.24 (m, 3 H,  $-\text{CH}_2-\text{CH}_3$ ). Chemoselectivity was determined by GC, nitrogen was used as the carrier gas with a flow of  $30 \text{ mL} \cdot \text{min}^{-1}$ , injector temperature and detector temperature were  $250^\circ\text{C}$ , column temperature was  $180^\circ\text{C}$ ,  $t_{\text{ethyl phenyl sulfoxide}} = 2.5 \text{ min}$ ; ee value was determined by HPLC ( $i\text{-PrOH}/n\text{-hexane} = 1: 9 \text{ (v/v)}$ ); flow rate =  $1.2 \text{ mL} \cdot \text{min}^{-1}$ ;  $25^\circ\text{C}$ ;  $\lambda = 254 \text{ nm}$ ; major enantiomer  $t_R = 5.75 \text{ min}$  and minor enantiomer  $t_S = 6.87 \text{ min}$  (see Figure S22- S24).

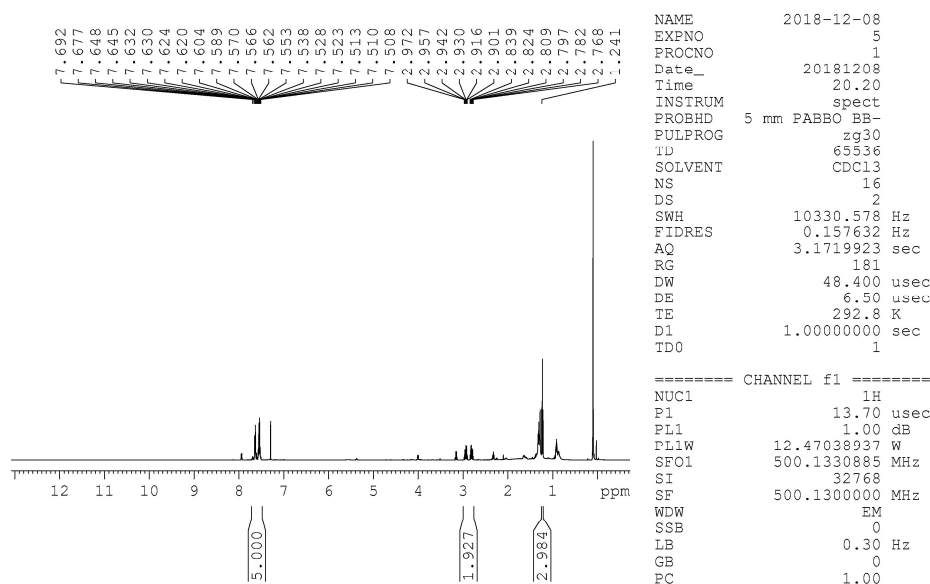

**Figure S21.**  $^1\text{H}$  NMR of phenyl ethyl sulfoxide.

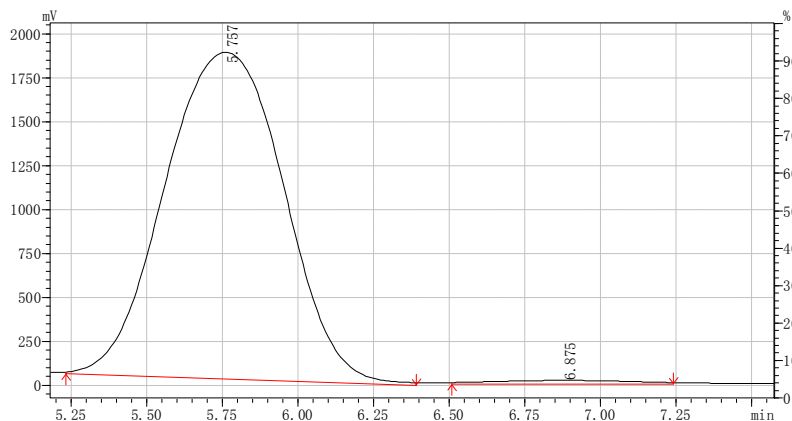

**Figure S22.** HPLC of phenyl ethyl sulfoxide obtained over  $\text{PS}_{10}(\text{IC})_2$  (ee value = 97%).

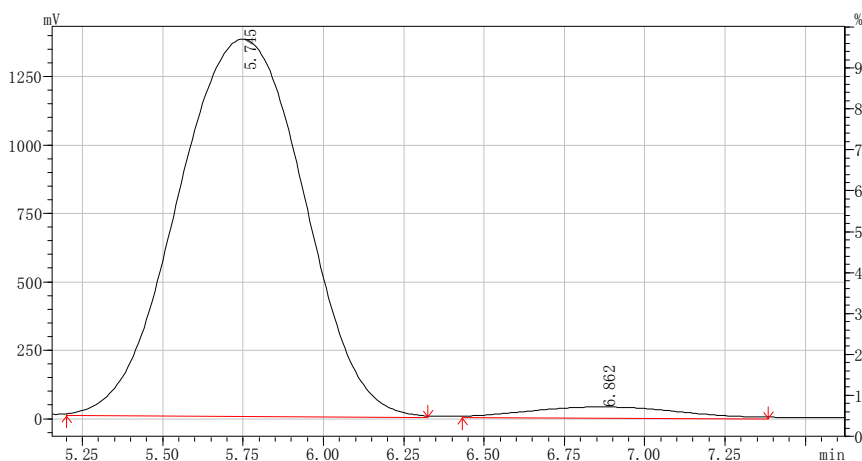

**Figure S23.** HPLC of phenyl ethyl sulfoxide obtained over  $\text{PS}_{10}\text{C}_2$  (ee value = 93%).

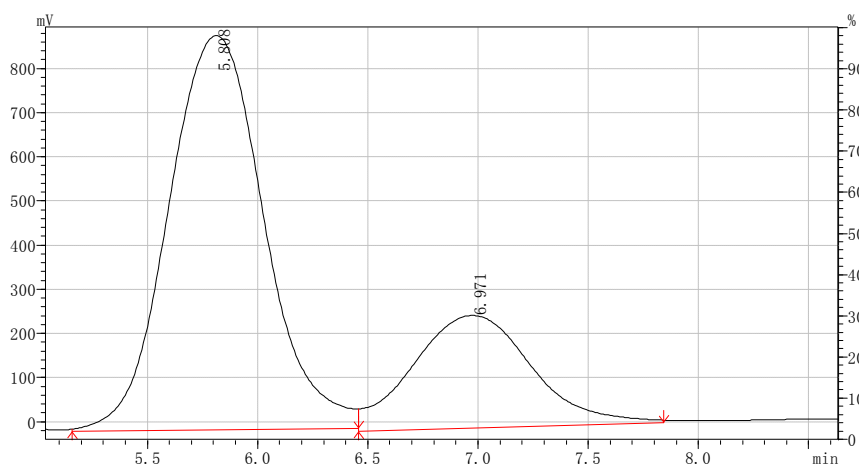

**Figure S24.** HPLC of phenyl ethyl sulfoxide obtained over  $\text{IL}/\text{Ti}(\text{salen})$  (ee value = 57%).

**Phenyl *n*-butyl sulfoxide:** The product has been identified by  $^1\text{H}$  NMR spectrum (see Figure S25).  $^1\text{H}$  NMR ( $\text{CDCl}_3$ , 500 MHz):  $\delta$  (ppm): 7.36-7.18 (m, 5 H, ArH), 2.97-2.94 (m, 2 H,  $\text{-CH}_2\text{-CH}_2\text{-CH}_2\text{-CH}_3$ ), 1.70-1.62 (m, 2 H,  $\text{-CH}_2\text{-CH}_2\text{-CH}_2\text{-CH}_3$ ), 1.51-1.48 (m, 2 H,  $\text{-CH}_2\text{-CH}_2\text{-CH}_2\text{-CH}_3$ ), 0.93-0.90 (m, 3 H,  $\text{-CH}_2\text{-CH}_2\text{-CH}_2\text{-CH}_3$ ). Chemoselectivity was determined by GC, nitrogen was used as the carrier gas with a flow of  $30 \text{ mL} \cdot \text{min}^{-1}$ , injector

temperature and detector temperature were 250 °C, column temperature was 180 °C, *t*<sub>n-butyl phenyl sulfoxide</sub> = 2.9 min; ee value was determined by HPLC (*i*-PrOH/ *n*-hexane = 1: 9 (v/v)); flow rate = 1.2 mL. min<sup>-1</sup>; 25 °C; λ = 254 nm; major enantiomer *t*<sub>R</sub> = 4.01 min and minor enantiomer *t*<sub>S</sub> = 4.88 min (see Figure S26-S28).

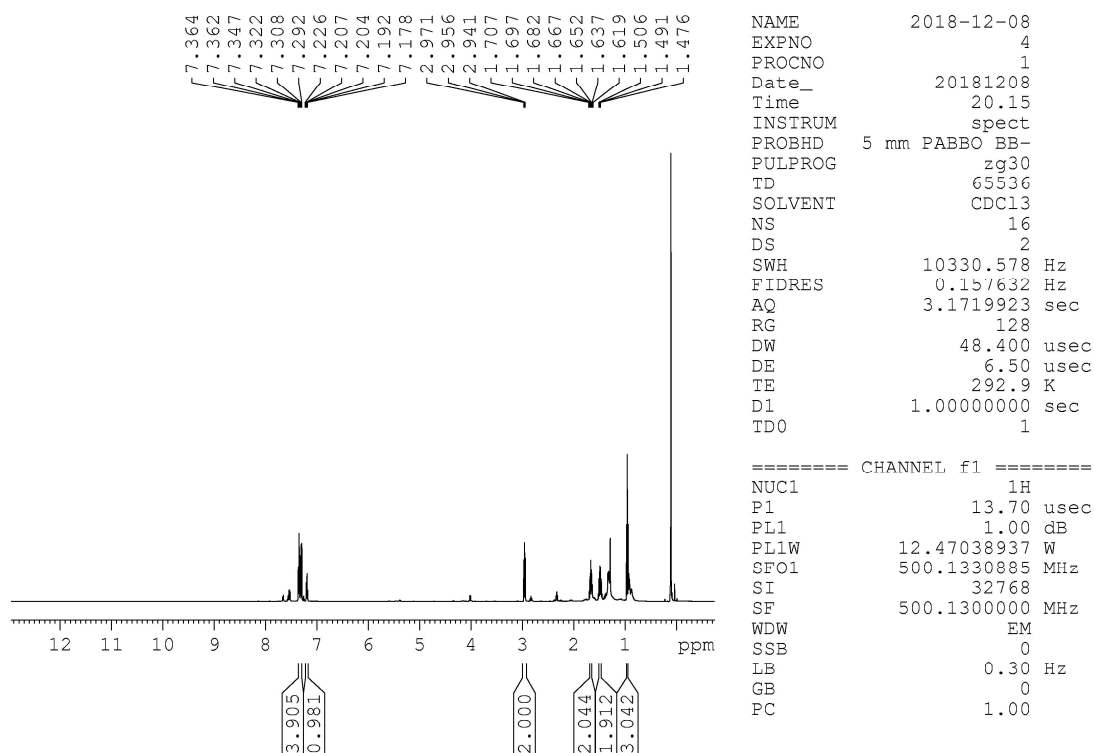

**Figure S25.** <sup>1</sup>H NMR of phenyl *n*-butyl sulfoxide.

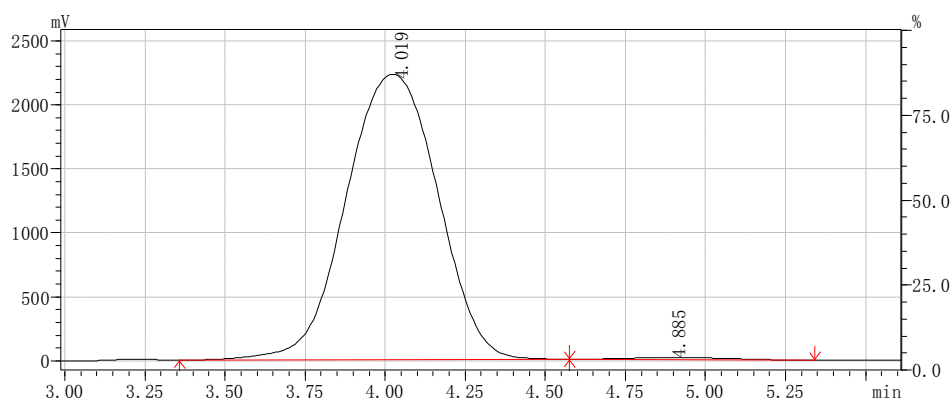

**Figure S26.** HPLC of phenyl *n*-butyl sulfoxide obtained over PS<sub>10</sub>(IC)<sub>2</sub> (ee value = 99%).

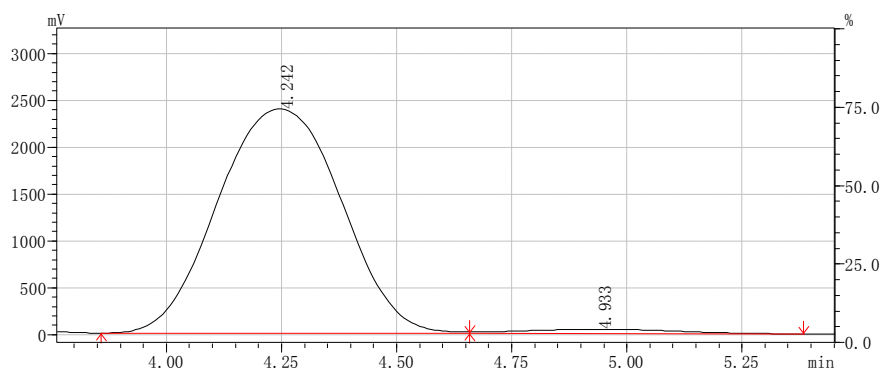

**Figure S27.** HPLC of phenyl *n*-butyl sulfoxide obtained over  $\text{PS}_{10}\text{C}_2$  (ee value = 94%).

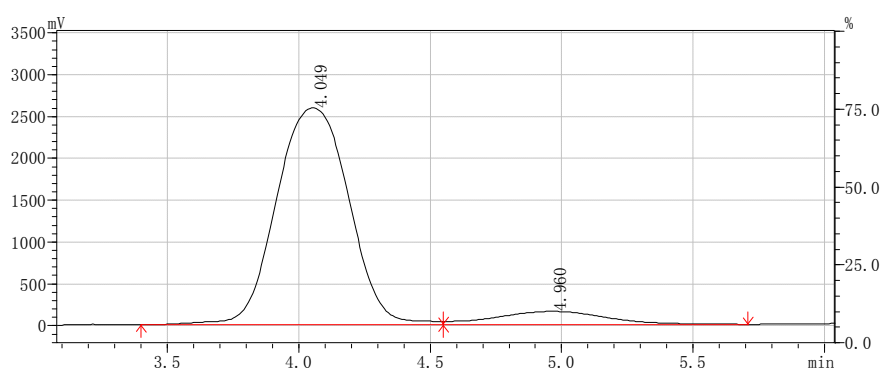

**Figure S28.** HPLC of phenyl *n*-butyl sulfoxide obtained over  $\text{IL}/\text{Ti}(\text{salen})$  (ee value = 86%).

**Phenyl *n*-hexyl sulfoxide:** The product has been identified by  $^1\text{H}$  NMR spectrum (see Figure S29).  $^1\text{H}$  NMR ( $\text{CDCl}_3$ , 500 MHz):  $\delta$  (ppm): 7.36-7.18 (m, 5 H, ArH), 2.97-2.94 (m, 2 H,  $-\text{CH}_2-\text{CH}_2-\text{CH}_2-\text{CH}_2-\text{CH}_2-\text{CH}_3$ ), 1.71-1.65 (m, 2 H,  $-\text{CH}_2-\text{CH}_2-\text{CH}_2-\text{CH}_2-\text{CH}_2-\text{CH}_3$ ), 1.49-1.43 (m, 2 H,  $-\text{CH}_2-\text{CH}_2-\text{CH}_2-\text{CH}_2-\text{CH}_2-\text{CH}_3$ ), 1.33-1.32 (m, 4 H,  $-\text{CH}_2-\text{CH}_2-\text{CH}_2-\text{CH}_2-\text{CH}_2-\text{CH}_3$ ), 0.91-0.87 (s, 3 H,  $-\text{CH}_3$ ). Chemoselectivity was determined by GC, nitrogen was used as the carrier gas with a flow of  $30 \text{ mL}\cdot\text{min}^{-1}$ , injector temperature and detector temperature were  $250^\circ\text{C}$ , column temperature was  $180^\circ\text{C}$ ,  $t_{n\text{-hexyl phenyl sulfoxide}} = 4.3 \text{ min}$ ; ee value was determined by HPLC (*i*-PrOH/ *n*-hexane = 1: 9 (v/v)); flow rate =  $1.2 \text{ mL}\cdot\text{min}^{-1}$ ;  $25^\circ\text{C}$ ;  $\lambda = 254 \text{ nm}$ ; major enantiomer  $t_R = 4.23 \text{ min}$  and minor enantiomer  $t_S = 4.81 \text{ min}$  (see Figure S30- S32).

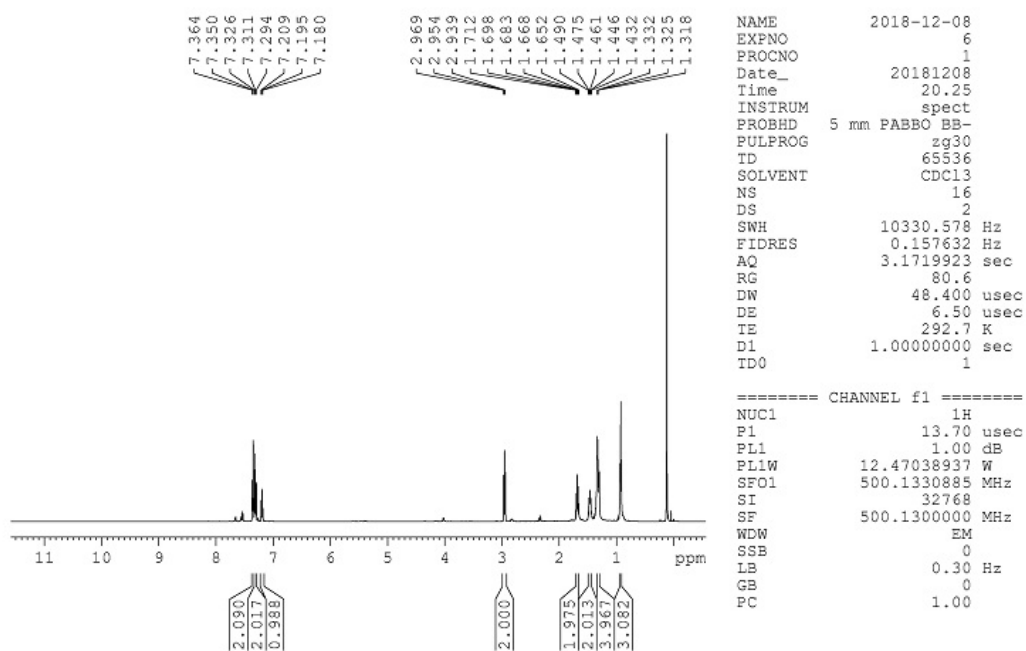

**Figure S29.**  $^1\text{H}$  NMR of phenyl *n*-hexyl sulfoxide.

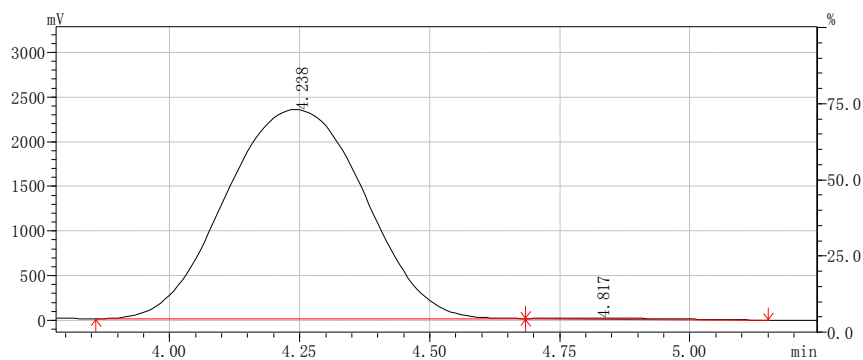

**Figure S30.** HPLC of phenyl *n*-hexyl sulfoxide obtained over  $\text{PS}_{10}(\text{IC})_2$  (ee value = 99%).

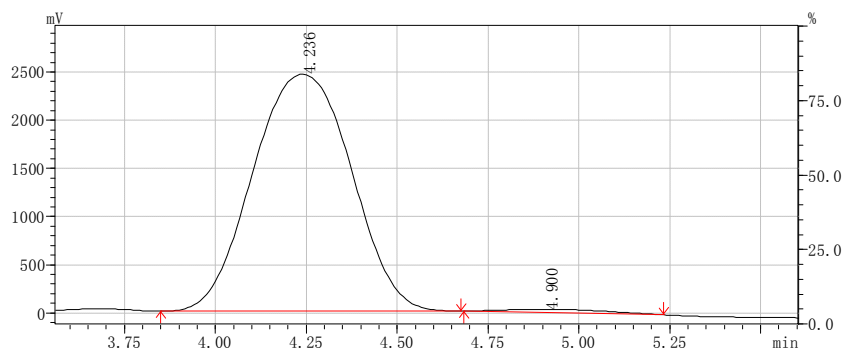

**Figure S31.** HPLC of phenyl *n*-hexyl sulfoxide obtained over  $\text{PS}_{10}\text{C}_2$  (ee value = 97%).

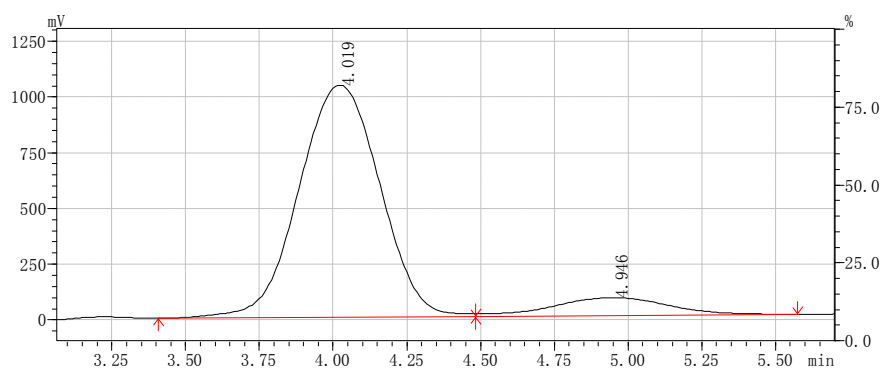

**Figure S32.** HPLC of phenyl *n*-hexyl sulfoxide obtained over *IL*/Ti(salen) (ee value = 79%).

***p*-Bromophenyl methyl sulfoxide:** The product has been identified by  $^1\text{H}$  NMR spectrum (see Figure S33).  $^1\text{H}$  NMR ( $\text{CDCl}_3$ , 500 MHz):  $\delta$  (ppm): 7.47-7.14 (m, 4 H, ArH), 2.94 (s, 3 H,  $-\text{SCH}_3$ ). Chemoselectivity was determined by GC, nitrogen was used as the carrier gas with a flow of 30  $\text{mL}\cdot\text{min}^{-1}$ , injector temperature and detector temperature were 250  $^\circ\text{C}$ , column temperature was 180  $^\circ\text{C}$ ,  $t_{\text{methyl } p\text{-bromophenyl sulfoxide}} = 11.2$  min; ee value was determined by HPLC (*i*-PrOH/*n*-hexane = 5: 5 (v/v)); flow rate = 1.2  $\text{mL}\cdot\text{min}^{-1}$ ; 25  $^\circ\text{C}$ ;  $\lambda = 254$  nm; major enantiomer  $t_R = 6.10$  min and minor enantiomer  $t_S = 7.33$  min (see Figure S34-S36).

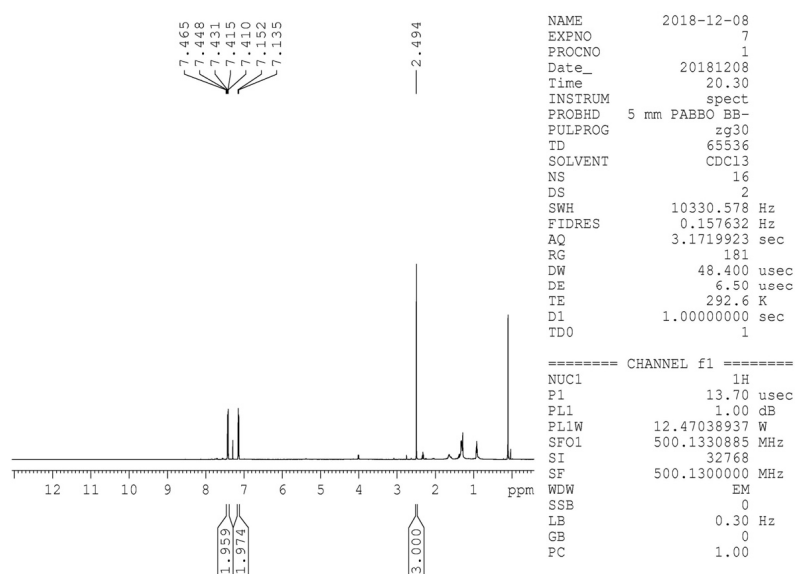

**Figure S33.**  $^1\text{H}$  NMR of *p*-bromophenyl methyl sulfoxide.

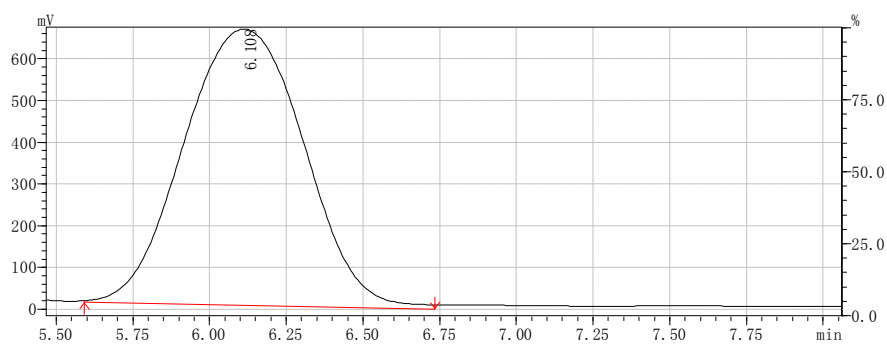

**Figure S34.** HPLC of *p*-bromophenyl methyl sulfoxide obtained over  $\text{PS}_{10}(\text{IS})_2$  (ee value >99%).

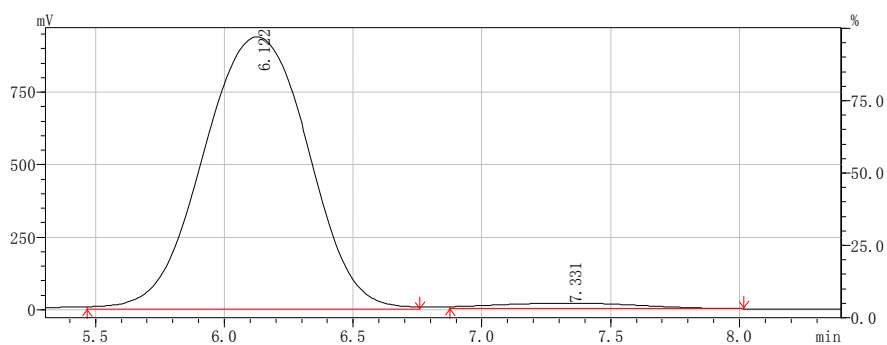

**Figure S35.** HPLC of *p*-bromophenyl methyl sulfoxide obtained over  $\text{PS}_{10}\text{C}_2$  (ee value =93%).

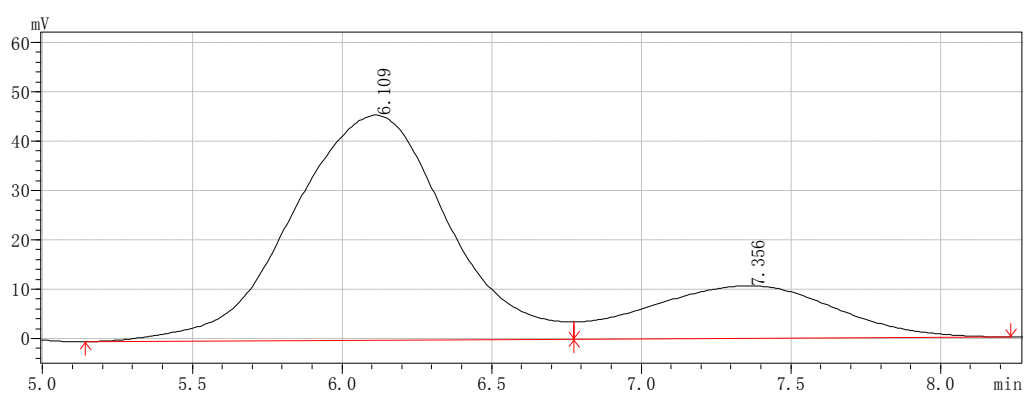

**Figure S36.** HPLC of *p*-bromophenyl methyl sulfoxide obtained over  $\text{IL}/\text{Ti}(\text{salen})$  (ee value = 54%).
